# Supplementary material
Source: PubMed Central journal article supplement (PMC3834031)
Supplement: NIHMS516651-supplement-Supplemental_Table_1.pdf [file NIHMS516651-supplement-Supplemental_Table_1.pdf]

**Supplemental Table 1.** Bosentan metabolism by human liver microsomes (HLM) and recombinant P450 enzymes

|            | m/z | HLM | CYP3A4 | CYP2C9 | CYP2C8 | CYP2C19 | CYP1A2 | CYP2B6 | CYP2D6 | Metabolite      |
|------------|-----|-----|--------|--------|--------|---------|--------|--------|--------|-----------------|
|            |     | (%) | (%)    | (%)    | (%)    | (%)     | (%)    | (%)    | (%)    |                 |
| Bosentan   | 552 | 83  | 39     | 89     | 100    | 100     | 100    | 100    | 100    | Parent          |
| Ro 64-1056 | 554 | 1   | 12     | ND     | ND     | ND      | ND     | ND     | ND     | Oxidation       |
| Ro 48-5033 | 568 | 6   | 27     | 11     | ND     | ND      | ND     | ND     | ND     | Oxidation       |
| Ro 47-8634 | 538 | 4   | 4      | ND     | ND     | ND      | ND     | ND     | ND     | O-demethylation |
| Others     |     | 6   | 18     | 0      | 0      | 0       | 0      | 0      | 0      |                 |

Final protein concentration was 0.5 mg/ mL in HLM incubations, and the enzyme concentration was 40 pmol/mL in the incubations with recombinant CYP enzymes. Samples were incubated for 0 and 60 minutes. Data is presented as percent of bosentan remaining or percent of bosentan converted to a specific metabolite.
