# Supplementary material
Source: PubMed Central journal article supplement (PMC3834031)
Supplement: NIHMS516651-supplement-Supplemental_Table_2.pdf [file NIHMS516651-supplement-Supplemental_Table_2.pdf]

**Supplemental Table 2.** Minor allele frequencies (MAF) of single nucleotide polymorphisms (SNPs) selected for genetic association analysis of bosentan-induced liver injury in Caucasians.

| <b>Gene</b>    | <b>SNP<sup>1</sup></b> | <b>MAF (%)</b> | <b>Reason for filtering</b> |
|----------------|------------------------|----------------|-----------------------------|
| <i>ABCC2</i>   | <b>rs717620</b>        | 23.2           |                             |
|                | <b>rs2273697</b>       | 21.4           |                             |
|                | rs17222723             | 2.7            | MAF<5%                      |
|                | rs8187710              | 2.7            | MAF<5%                      |
|                | <b>rs1885301</b>       | 42.9           |                             |
|                | <b>rs7910642</b>       | 8.0            |                             |
|                | <b>rs2804402</b>       | 57.1           |                             |
| <i>ABCB11</i>  | <b>rs2287622</b>       | 45.5           |                             |
| <i>SLCO1B1</i> | <b>rs11045819</b>      | 11.6           |                             |
|                | <b>rs2306283</b>       | 34.8           |                             |
|                | <b>rs4149056</b>       | 18.8           |                             |
| <i>SLCO1B3</i> | <b>rs414917</b>        | 17.0           |                             |
|                | rs7311358              | 16.1           | In LD with rs414917         |
| <i>CYP2C9</i>  | <b>*2/ rs1799853</b>   | 12.5           |                             |
|                | <b>*3/ rs1057910</b>   | 8.0            |                             |

<sup>1</sup>Fifteen SNPs in five genes encoding proteins involved in bosentan disposition were selected based on literature review. Twelve SNPs (in bold) were analyzed after filtering for MAF (<5%) and linkage disequilibrium ( $r^2 > 0.8$ ).
