# Supplementary material
Source: PubMed Central journal article supplement (PMC3834031)
Supplement: NIHMS516651-supplement-Supplemental_Table_3.pdf [file NIHMS516651-supplement-Supplemental_Table_3.pdf]

**Supplemental Table 3.** Post hoc power calculations for genetic association analyses of increase in ALT and AST and for occurrence of DILI.

| Variant      | Regression Coefficient <sup>1</sup> | Standard Error of Regression Coefficient | <i>P</i> | Power <sup>2</sup> | Adjusted Power <sup>3</sup> |
|--------------|-------------------------------------|------------------------------------------|----------|--------------------|-----------------------------|
| <b>ALT</b>   |                                     |                                          |          |                    |                             |
| rs717620     | -0.08                               | 0.24                                     | 0.74     | 0.05               | 0.01                        |
| rs2273697    | -0.08                               | 0.28                                     | 0.78     | 0.05               | 0.01                        |
| rs1885301    | -0.07                               | 0.19                                     | 0.73     | 0.05               | 0.01                        |
| rs7910642    | 0.41                                | 0.41                                     | 0.33     | 0.16               | 0.03                        |
| rs2804402    | 0.07                                | 0.19                                     | 0.73     | 0.05               | 0.01                        |
| rs2287622    | 0.17                                | 0.20                                     | 0.39     | 0.13               | 0.02                        |
| rs11045819   | 0.27                                | 0.30                                     | 0.39     | 0.14               | 0.02                        |
| rs2306283    | 0.15                                | 0.24                                     | 0.53     | 0.09               | 0.01                        |
| rs4149056    | 0.10                                | 0.31                                     | 0.76     | 0.05               | 0.01                        |
| rs7311358    | 0.25                                | 0.28                                     | 0.38     | 0.14               | 0.02                        |
| *2/rs1799853 | 0.78                                | 0.34                                     | 0.03     | 0.62               | 0.26                        |
| *3/rs1057910 | -0.49                               | 0.39                                     | 0.21     | 0.24               | 0.05                        |
| <b>AST</b>   |                                     |                                          |          |                    |                             |
| rs717620     | 0.06                                | 0.19                                     | 0.76     | 0.05               | 0.01                        |
| rs2273697    | -0.21                               | 0.22                                     | 0.34     | 0.16               | 0.03                        |
| rs1885301    | 0.03                                | 0.15                                     | 0.82     | 0.04               | 0.00                        |
| rs7910642    | 0.07                                | 0.33                                     | 0.82     | 0.04               | 0.00                        |
| rs2804402    | -0.03                               | 0.15                                     | 0.82     | 0.04               | 0.00                        |
| rs2287622    | 0.02                                | 0.16                                     | 0.92     | 0.03               | 0.00                        |
| rs11045819   | 0.26                                | 0.24                                     | 0.27     | 0.19               | 0.04                        |

|              |       |      |      |      |      |
|--------------|-------|------|------|------|------|
| rs2306283    | 0.00  | 0.19 | 1.00 | 0.03 | 0.00 |
| rs4149056    | -0.17 | 0.24 | 0.48 | 0.10 | 0.02 |
| rs7311358    | 0.14  | 0.22 | 0.52 | 0.09 | 0.01 |
| *2/rs1799853 | 0.66  | 0.26 | 0.02 | 0.69 | 0.33 |
| *3/rs1057910 | -0.34 | 0.31 | 0.28 | 0.19 | 0.04 |

**DILI**

|              | <b>OR 95% CI</b>   | <b>OR 95% CI</b>   | <b>P</b> | <b>Power<sup>2</sup></b> | <b>Adjusted Power<sup>3</sup></b> |
|--------------|--------------------|--------------------|----------|--------------------------|-----------------------------------|
|              | <b>lower limit</b> | <b>upper limit</b> |          |                          |                                   |
| rs717620     | 0.11               | 23.52              | 0.64     | 0.04                     | 0.00                              |
| rs2273697    | 0.01               | 6.18               | 0.64     | 0.03                     | 0.00                              |
| rs1885301    | 0.14               | 103.22             | 1.00     | 0.01                     | 0.00                              |
| rs7910642    | 0.00               | 8.41               | 1.00     | 0.00                     | 0.00                              |
| rs2804402    | 0.02               | 4.21               | 0.23     | 0.19                     | 0.03                              |
| rs2287622    | 0.03               | 6.74               | 0.59     | 0.09                     | 0.01                              |
| rs11045819   | 0.30               | 71.49              | 0.17     | 0.29                     | 0.06                              |
| rs2306283    | 0.15               | 111.62             | 1.00     | 0.01                     | 0.00                              |
| rs4149056    | 0.01               | 7.26               | 1.00     | 0.01                     | 0.00                              |
| rs7311358    | 0.02               | 11.25              | 1.00     | 0.01                     | 0.00                              |
| *2/rs1799853 | 2.29               | Infinite           | 0.003    | 0.81                     | 0.60                              |
| *3/rs1057910 | 0.00               | 8.41               | 1.00     | 0.00                     | 0.00                              |

<sup>1</sup> The regression coefficient from a linear regression of the natural log transformed relative fold increase in ALT or AST from baseline with each SNP.

<sup>2</sup> The power of detecting an effect if the true effect is the observed effect.

<sup>3</sup> The power adjusted for 12 polymorphisms tested using Bonferroni correction.
